# Supplementary material for: High Throughput Multiple Locus Variable Number of Tandem Repeat Analysis (MLVA) of Staphylococcus aureus from Human, Animal and Food Sources
Source: PubMed Central journal article supplement (PMC3342327; doi:10.1371/journal.pone.0033967), 2012-05-02
Supplement: pone.0033967.s001.pdf [file pone.0033967.s001.pdf]

MLVA16<sub>Orsay</sub>

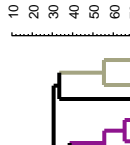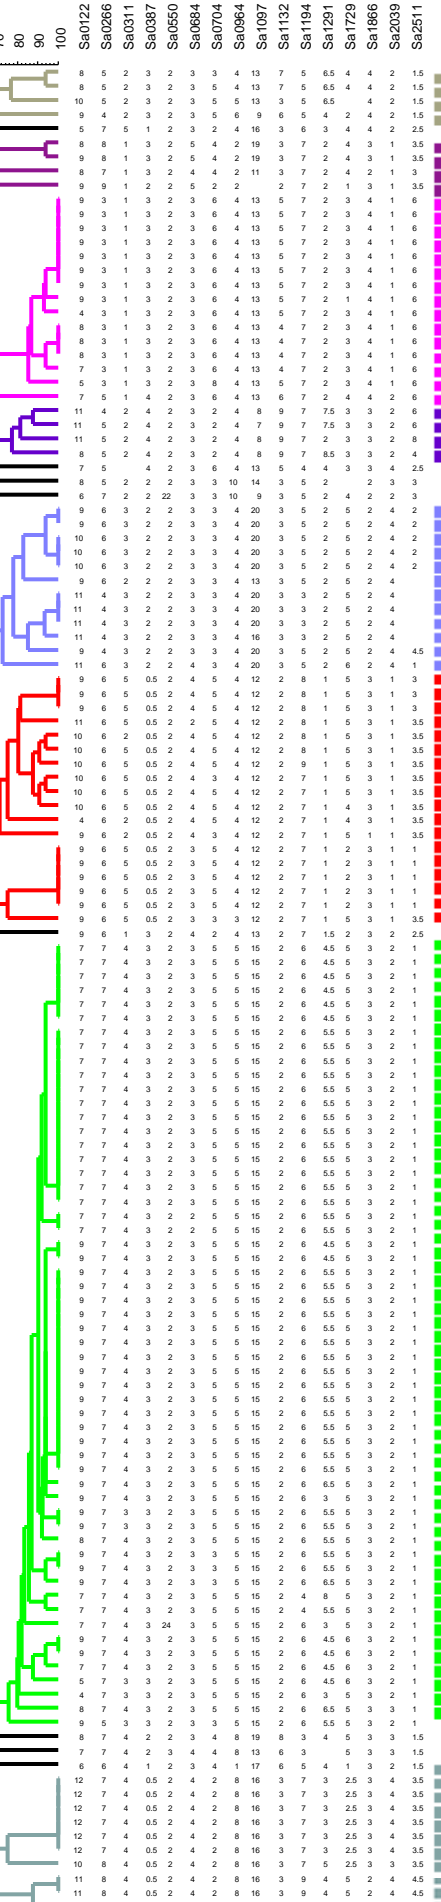

| Strain ID | CC    | ST    | spa type         | spa          | Host           | Physiological origin         | MetR |
|-----------|-------|-------|------------------|--------------|----------------|------------------------------|------|
| TrSa110   | CC25  |       | t5791            | ZGFGU2DMM    | Human          |                              |      |
| 339E      | CC25  |       |                  |              | Human          | Unpasteurized milk cheese    | MSSA |
| NL59      | CC25  | ST25  | t087             | ZFGU2DMGMM   | Human          | Food sample (food poisoning) |      |
| 1874#     | CC25  |       | t078             | ZFGU2DMGMM   | Human          |                              |      |
| 7H        | CC25  |       | t3576            | ZNMOM        | Horse          |                              | MSSA |
| DB-494-03 | CC51  |       |                  |              | Sheep          | Mastitis                     | MSSA |
| DB-494-02 | CC51  |       |                  |              | Rabbit         | Mammary abscess              | MSSA |
| DB-452-13 | CC51  |       |                  |              | Turkey         |                              | MSSA |
| Harm32_43 | CC91  | ST425 | t435             | I2ZEMMMJH2M  | Human          |                              | MSSA |
| 495       | CC91  | ST9   | t337             | UKJAGJAB     | Swine          | Skin infection               | MSSA |
| 119       | CC91  |       | t337             | UKJAGJAB     | Swine          | Skin infection               | MSSA |
| 1022      | CC91  |       | t337             | UKJAGJAB     | Swine          | Skin infection               | MSSA |
| FAL 226   | CC91  |       | t337             | UKJAGJAB     | Swine          | Skin infection               | MSSA |
| 2594      | CC91  |       | t337             | UKJAGJAB     | Swine          | MMA-syndrome                 | MSSA |
| 2926      | CC91  |       | t337             | UKJAGJAB     | Swine          | MMA-syndrome                 | MSSA |
| 2962      | CC91  |       | t337             | UKJAGJAB     | Swine          | MMA-syndrome                 | MSSA |
| MT9186    | CC91  |       |                  |              | Swine          | Cervical swab                | MSSA |
| 124       | CC91  | t1939 | UJAB             |              | Swine          | Genital tract infection      | MSSA |
| 582       | CC91  | t337  | UKJAGJAB         |              | Swine          | Skin infection               | MSSA |
| Chi-6     | CC91  | t1430 | UKJAGJAB         |              | Chicken meat   | Food sample                  | MSSA |
| Chi-9     | CC91  | t1430 | UKJAGJAB         |              | Chicken meat   | Food sample                  | MSSA |
| 7         | CC91  | t1419 | UJAB             |              | Swine          | Skin infection               | MSSA |
| 2920      | CC91  | t899  | UKJAB            |              | Swine          | MMA-syndrome                 | MSSA |
| TrSa148   | CC91  |       |                  |              | Human          |                              |      |
| sa601     | CC15  | t7200 | UJGB[r194]GGJAGJ |              | Cat            | Respiratory tract infection  | MSSA |
| sa1777    | CC15  |       |                  |              | Cat            | Respiratory tract infection  | MSSA |
| NL48      | CC15  | ST15  | t084             | UJGBGGJAGJ   | Human          |                              |      |
| sa323     | CC15  |       | t094             | UJGBGGJ      | Cat            |                              |      |
| Harm43_50 | CC15  | ST80  | t044             | UJGBBPB      | Human          | Respiratory tract infection  | MSSA |
| TrSa45    | CC15  |       | t216             | ZDMDMNBK     | Human          |                              | MSSA |
| Harm12_50 | CC15  | ST156 | t172             | ZDMAKQB      | Human          |                              | MSSA |
| 1251      | CC30  |       |                  | WGKAKAQM     | Swine          | MMA-syndrome                 | MSSA |
| 3036      | CC30  |       | t021             | WGKAKAQM     | Swine          | MMA-syndrome                 | MSSA |
| 528       | CC30  |       | t318             | WGKAKAQM     | Swine          | Genital tract infection      | MSSA |
| 1213      | CC30  |       | t318             | WGKAKAQM     | Swine          | MMA-syndrome                 | MSSA |
| 2533      | CC30  |       | t318             | WGKAKAQM     | Swine          | Genital tract infection      | MSSA |
| Harm25_43 | CC30  | ST30  | t021             | WGKAKAQM     | Human          |                              | MSSA |
| Harm15_50 | CC30  | ST36  | t018             | WGKAKAQM     | Human          |                              | MSSA |
| Harm24_50 | CC30  | ST36  | t018             | WGKAKAQM     | Human          |                              | MSSA |
| Harm30_43 | CC30  | ST36  | t018             | WGKAKAQM     | Human          |                              | MSSA |
| Harm25_50 | CC30  | ST36  | t018             | WGKAKAQM     | Human          |                              | MSSA |
| 1804#     | CC30  |       | t021             | WGKAKAQM     | Horse          |                              | MSSA |
| 1525#     | CC30  |       | t318             | WGKAKAQM     | Horse          |                              | MSSA |
| BL5       | CC45  |       |                  |              | Human          |                              |      |
| Harm32_50 | CC45  | ST45  | t038             | XE3BBEMBK    | Human          |                              | MSSA |
| Harm33_50 | CC45  | ST45  | t038             | XE3BBEMBK    | Human          |                              | MSSA |
| sa723     | CC45  |       | t589             | XXAKBBEMBK   | Cat            | Skin infection               | MSSA |
| Harm16_50 | CC45  | ST45  | t015             | XXAKBBEMBK   | Human          |                              | MSSA |
| Harm23_43 | CC45  | ST45  | t050             | XXAKBBEMBK   | Human          |                              | MSSA |
| sa351     | CC45  | ST45  | t1162            | XXAKBEAKB    | Cat            | Skin infection               | MSSA |
| Harm46_50 | CC45  | ST45  | t015             | XXAKBBEMBK   | Human          |                              | MSSA |
| 338E      | CC45  |       |                  |              | Cooked chicken | Food sample (food poisoning) | MSSA |
| sa573     | CC45  |       | t015             | XXAKBBEMBK   | Dog            | Otitis externa               | MSSA |
| sa2805    | CC45  |       | t1644            | XEBK         | Cat            | Respiratory tract infection  | MSSA |
| sa722     | CC45  |       | t031             | XXAKBBEMBK   | Cat            | Skin infection               | MSSA |
| Harm38_50 | CC45  | ST45  | t004             | AZAKEMBK     | Human          |                              | MSSA |
| Harm39_50 | CC45  | ST45  | t004             | AZAKEMBK     | Human          |                              | MSSA |
| Harm11_43 | CC45  | ST45  | t004             | AZAKEMBK     | Human          |                              | MSSA |
| Harm12_43 | CC45  | ST45  | t004             | AZAKEMBK     | Human          |                              | MSSA |
| Harm13_43 | CC45  | ST45  | t004             | AZAKEMBK     | Human          |                              | MSSA |
| sa2900    | CC45  | ST45  | t065             | AZAKEMBK     | Dog            | Respiratory tract infection  | MSSA |
| TrSa228   | CC398 |       |                  |              | Human          |                              |      |
| 324       | CC398 |       | t011             | XXAOBQO      | Swine          | Genital tract infection      | MSSA |
| 2187      | CC398 | ST398 | t011             | XXAOBQO      | Swine          | MMA-syndrome                 | MSSA |
| Chi-1     | CC398 |       | t011             | XXAOBQO      | Chicken meat   | Food sample                  | MSSA |
| Chi-2     | CC398 |       | t011             | XXAOBQO      | Chicken meat   | Food sample                  | MSSA |
| Chi-7     | CC398 |       | t011             | XXAOBQO      | Chicken meat   | Food sample                  | MSSA |
| Chi-10    | CC398 |       | t011             | XXAOBQO      | Chicken meat   | Food sample                  | MSSA |
| 19        | CC398 |       | t011             | XXAOBQO      | Swine          | Skin infection               | MSSA |
| 296       | CC398 | ST398 | t011             | XXAOBQO      | Swine          | Genital tract infection      | MSSA |
| 1295      | CC398 |       | t011             | XXAOBQO      | Swine          | Urinary tract infection      | MSSA |
| 2296      | CC398 | ST398 | t011             | XXAOBQO      | Swine          | Genital tract infection      | MSSA |
| 2171      | CC398 |       | t011             | XXAOBQO      | Swine          | Genital tract infection      | MSSA |
| Tur-1     | CC398 |       | t011             | XXAOBQO      | Turkey meat    | Food sample                  | MSSA |
| Tur-3     | CC398 |       | t011             | XXAOBQO      | Turkey meat    | Food sample                  | MSSA |
| Tur-4     | CC398 |       | t011             | XXAOBQO      | Turkey meat    | Food sample                  | MSSA |
| Tur-7     | CC398 |       | t011             | XXAOBQO      | Turkey meat    | Food sample                  | MSSA |
| Tur-13    | CC398 |       | t011             | XXAOBQO      | Turkey meat    | Food sample                  | MSSA |
| Tur-21    | CC398 |       | t011             | XXAOBQO      | Turkey meat    | Food sample                  | MSSA |
| Chi-4     | CC398 |       | t011             | XXAOBQO      | Chicken meat   | Food sample                  | MSSA |
| Chi-5     | CC398 |       | t011             | XXAOBQO      | Chicken meat   | Food sample                  | MSSA |
| 1921      | CC398 | ST398 | t011             | XXAOBQO      | Swine          | Skin infection               | MSSA |
| Tur-18    | CC398 |       | t574             | [G85]XXAOBQO | Turkey meat    | Food sample                  | MSSA |
| 3666      | CC398 |       | t034             | XXAOAQBQO    | Poultry        |                              | MSSA |
| 3669      | CC398 |       | t034             | XXAOAQBQO    | Poultry        |                              | MSSA |
| 604       | CC398 |       | t034             | XXAOAQBQO    | Swine          | Genital tract infection      | MSSA |
| 609       | CC398 |       | t034             | XXAOAQBQO    | Poultry        |                              | MSSA |
| 1230      | CC398 |       | t034             | XXAOAQBQO    | Poultry        |                              | MSSA |
| 1796      | CC398 |       | t034             | XXAOAQBQO    | Poultry        |                              | MSSA |
| 3119      | CC398 |       | t034             | XXAOAQBQO    | Poultry        |                              | MSSA |
| 3667      | CC398 |       | t034             | XXAOAQBQO    | Poultry        |                              | MSSA |
| 3670      | CC398 |       | t034             | XXAOAQBQO    | Poultry        |                              | MSSA |
| PLM2      | CC398 |       | t034             | XXAOAQBQO    | Turkey meat    | Food sample                  | MSSA |
| Tur-6     | CC398 |       | t034             | XXAOAQBQO    | Turkey meat    | Food sample                  | MSSA |
| Tur-8     | CC398 |       | t034             | XXAOAQBQO    | Turkey meat    | Food sample                  | MSSA |
| Tur-10    | CC398 |       | t034             | XXAOAQBQO    | Turkey meat    | Food sample                  | MSSA |
| Tur-15    | CC398 |       | t034             | XXAOAQBQO    | Turkey meat    | Food sample                  | MSSA |
| Chi-3     | CC398 |       | t034             | XXAOAQBQO    | Chicken meat   | Food sample                  | MSSA |
| Chi-8     | CC398 |       | t034             | XXAOAQBQO    | Chicken meat   | Food sample                  | MSSA |
| 2241      | CC398 |       | t034             | XXAOAQBQO    | Poultry        |                              | MSSA |
| Tur-22    | CC398 |       | t034             | XXAOAQBQO    | Turkey meat    | Food sample                  | MSSA |
| 2895      | CC398 |       | t034             | XXAOAQBQO    | Poultry        |                              | MSSA |
| 5006      | CC398 |       | t034             | XXAOAQBQO    | Poultry        |                              | MSSA |
| 87        | CC398 |       | t2346            | XXAOBQO      | Turkey meat    | Food sample                  | MSSA |
| 825       | CC398 | ST398 | t034             | XXAOAQBQO    | Swine          | Skin infection               | MSSA |
| Tur-11    | CC398 |       | t034             | XXAOAQBQO    | Turkey meat    | Food sample                  | MSSA |
| 3639      | CC398 |       | t034             | XXAOAQBQO    | Poultry        |                              | MSSA |
| Tur-12    | CC398 |       | t011             | XXAOBQO      | Turkey meat    | Food sample                  | MSSA |
| Tur-17    | CC398 |       | t011             | XXAOBQO      | Turkey meat    | Food sample                  | MSSA |
| Tur-5     | CC398 |       | t011             | XXAOBQO      | Turkey meat    | Food sample                  | MSSA |
| 963       | CC398 |       | t034             | XXAOAQBQO    | Swine          | Skin infection               | MSSA |
| 2791      | CC398 |       | t034             | XXAOAQBQO    | Swine          | Skin infection               | MSSA |
| Tur-19    | CC398 |       | t011             | XXAOBQO      | Turkey meat    | Food sample                  | MSSA |
| Tur-16    | CC398 |       | t899             | UKJAB        | Turkey meat    | Food sample                  | MSSA |
| sa2745    | CC398 |       | t3041            | XXAOO        | Cat            | Respiratory tract infection  | MSSA |
| TrSa224   | CC398 |       | t5719            | XXAOAQBQO    | Human          |                              | MSSA |
| Tur-20    | CC398 |       | t034             | XXAOAQBQO    | Turkey meat    | Food sample                  | MSSA |
| TrSa180   | CC398 |       | t5662            | UGFMFBPB     | Human          |                              | MSSA |
| sa263     | CC398 |       | t912             | XFMEEBE      | Cat            | Respiratory tract infection  | MSSA |
| 3665      | CC398 |       | t189             | UJGFBM       | Poultry        |                              | MSSA |
| 140a      | CC133 | ST133 | t2678            | D2KGFJEMMMJQ | Sheep          | Skin colonizer               | MSSA |
| 141a      | CC133 |       | t2678            | D2KGFJEMMMJQ | Sheep          | Skin colonizer               | MSSA |
| 50369#    | CC133 |       | t2678            | D2KGFJEMMMJQ | Sheep          | Skin colonizer               | MSSA |
| 56327b    | CC133 |       | t2678            | D2KGFJEMMMJQ | Sheep          | Skin colonizer               | MSSA |
| 65341d    | CC133 |       | t2678            | D2KGFJEMMMJQ | Sheep          | Skin colonizer               | MSSA |
| 85933c    | CC133 |       | t2678            | D2KGFJEMMMJQ | Sheep          | Skin colonizer               | MSSA |
| 428G      | CC133 |       | t2678            | D2KGFJEMMMJQ | Goat milk      | Food sample (survey)         | MSSA |
| 138c      | CC133 |       | t2678            | D2KGFJEMMMJQ | Sheep          | Skin colonizer               | MSSA |
| 38539a    | CC133 |       | t2678            | D2KGFJEMMMJQ | Sheep          | Skin colonizer               | MSSA |
