# Supplementary material for: High Throughput Multiple Locus Variable Number of Tandem Repeat Analysis (MLVA) of Staphylococcus aureus from Human, Animal and Food Sources
Source: PubMed Central journal article supplement (PMC3342327; doi:10.1371/journal.pone.0033967), 2012-05-02

A

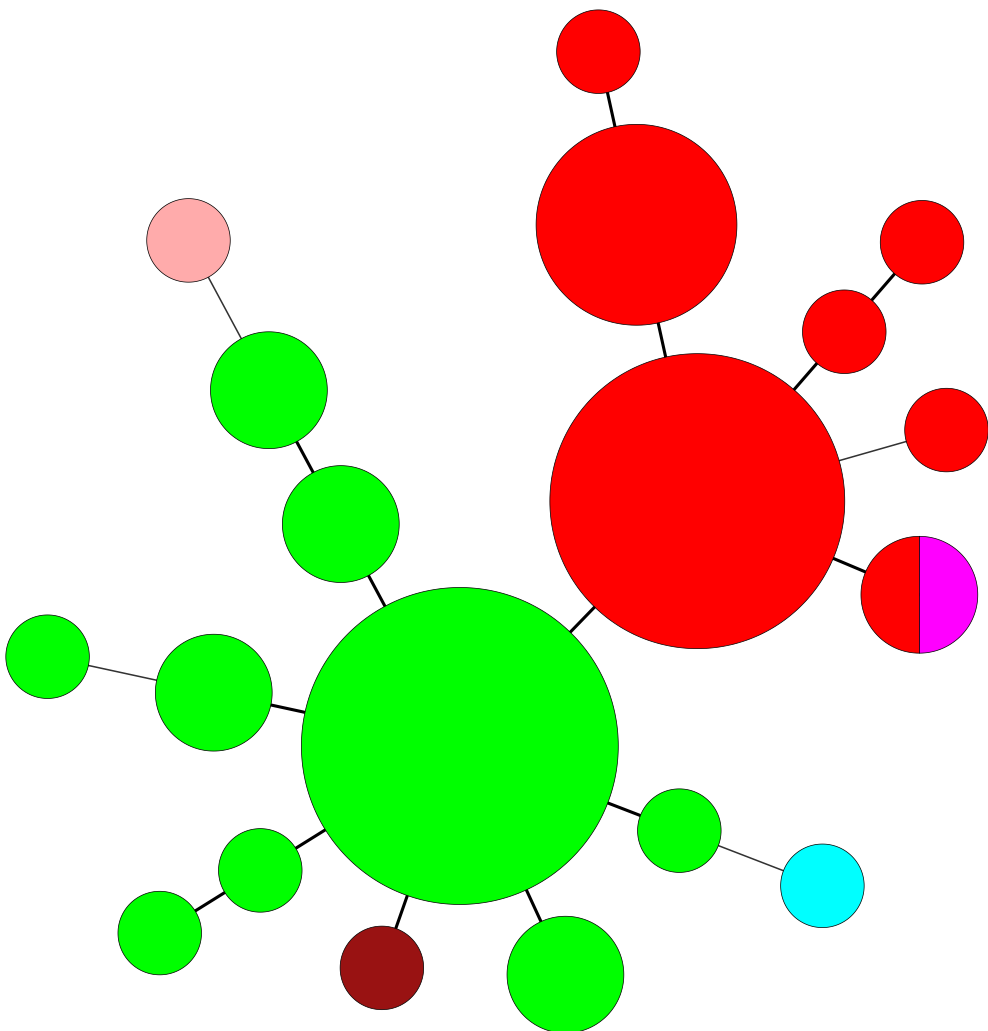

B

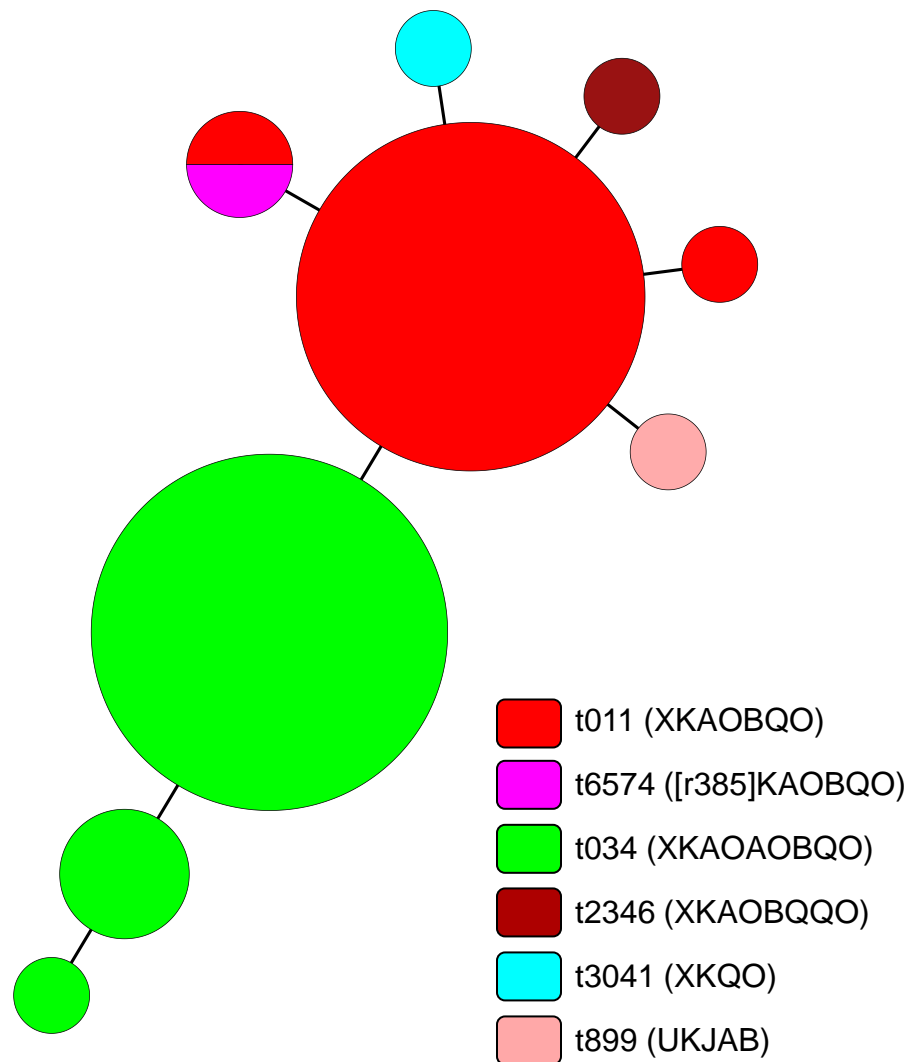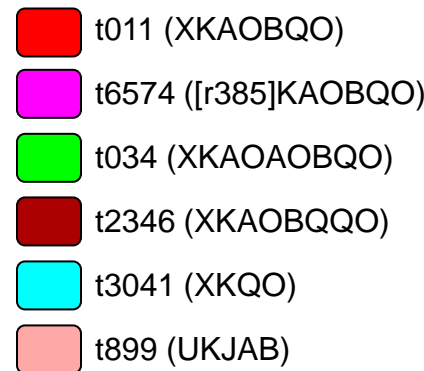

Supplement: pone.0033967.s002.pdf [file pone.0033967.s002.pdf]
